# Supplementary material
Source: publisher figshare collection journal article supplement (https://acs.figshare.com/ndownloader/files/13873151)
Supplement: Supplementary file 1 [file 13873151]

Supporting information

# Static and Dynamic Piezopotential Modulation in Piezo-Electret Gated MoS<sub>2</sub> Field Effect Transistor

*Jing Zhao<sup>†</sup>, Zheng We<sup>‡</sup>, Qian Zhang<sup>†</sup>, Hua Yu<sup>‡</sup>, Shuopei Wang<sup>‡</sup>, Xixi Yang<sup>†</sup>, Guoyun*

*Gao<sup>†</sup>, Shanshan Qin<sup>†</sup>, Guangyu Zhang<sup>\*‡,§</sup>, Qijun Sun<sup>\*†,||</sup> and Zhong Lin Wang<sup>\*†,||,⊥</sup>*

<sup>†</sup>Beijing Institute of Nanoenergy and Nanosystems, Chinese Academy of Sciences,  
Beijing 100083, China

<sup>‡</sup>Beijing National Laboratory for Condensed Matter Physics and Institute of Physics,  
Chinese Academy of Sciences, Beijing, 100190, China

<sup>||</sup> Center on Nanoenergy Research, School of Physical Science and Technology, Guangxi  
University, Nanning, 530004, China

<sup>§</sup>Collaborative Innovation Center of Quantum Matter; Beijing Key Laboratory for Nanomaterials and Nanodevices, Beijing 100190, China

<sup>⊥</sup>School of Materials Science and Engineering, Georgia Institute of Technology, Atlanta, Georgia 30332-0245, United States

### (1) Transfer property of MoS<sub>2</sub> FET without P(VDF-TrFE)

The typical transfer characteristics of the device without P(VDF-TrFE) was shown in **Figure S1**. Due to the high dielectric constant of the Al<sub>2</sub>O<sub>3</sub>, the on/off ratio can be higher

than 10<sup>5</sup> with the gate voltage sweeping from -3 V to 3 V. According to the equation:

$\mu = \frac{L}{WC} \frac{\partial I_D}{\partial V_G} \frac{1}{V_D}$ , the mobility was calculated to be ~ 30 cm<sup>2</sup>·V<sup>-1</sup>·s<sup>-1</sup> with the channel length

and width at ~ 20 μm and ~ 5 μm, respectively.

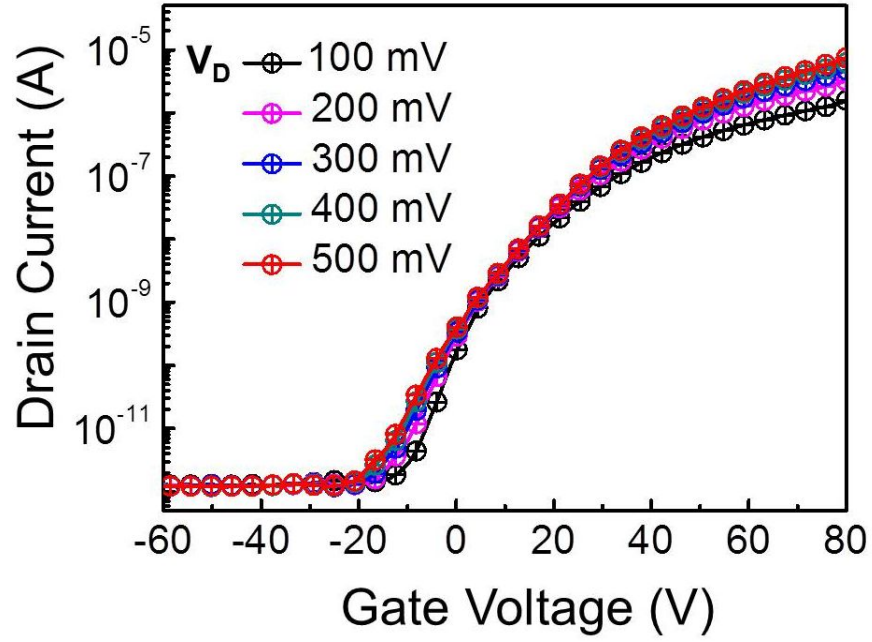

**Figure S1.** The transfer properties of MoS<sub>2</sub> FET without P(VDF-TrFE). The channel length and width are 20  $\mu\text{m}$  and 5  $\mu\text{m}$ , respectively.

(2) The schematic diagram of the device back-gated by the P(VDF-TrFE)

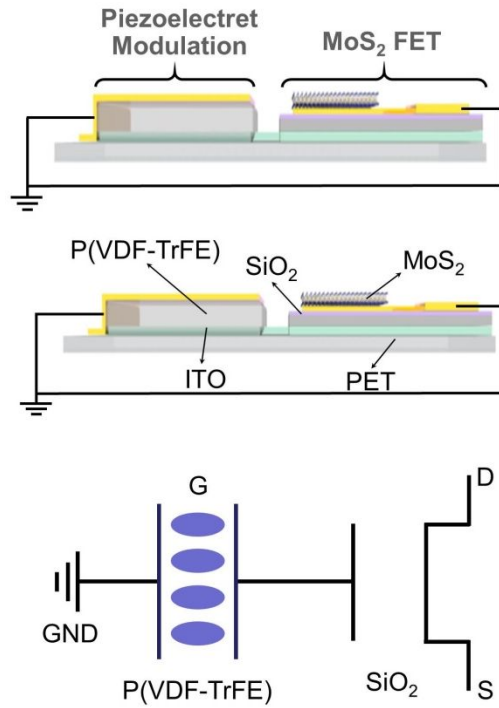

**Figure S2.** The schematic diagram of the MoS<sub>2</sub> FET gated by SiO<sub>2</sub> through sharing the ITO gate with the P(VDF-TrFE) device and equivalent circuit diagram.

(3) Energy band bend and charge distribution in P(VDF-TrFE) with different polarization conditions

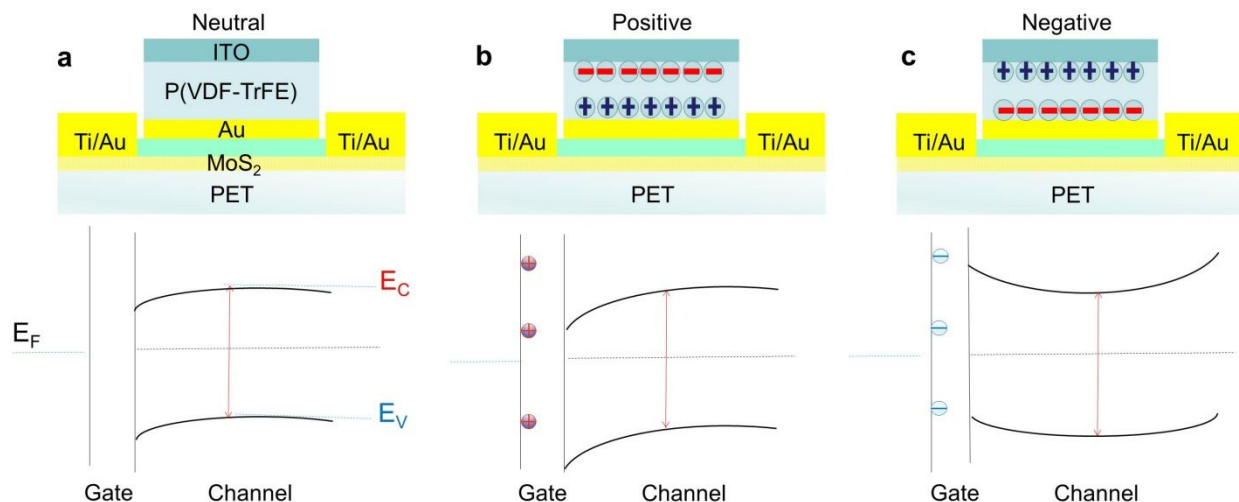

**Figure S3.** The cross-section structures of MoS<sub>2</sub> FET with P(VDF-TrFE) and equilibrium energy band diagrams of three different polarization states ( $V_D = 0$  V).  $E_F$ ,  $E_C$ ,  $E_V$  are the Fermi level energy, minimum conduction band energy and maximum valence band energy, respectively. (a) MoS<sub>2</sub> FET without pre-polarized P(VDF-TrFE). (b) (c) The charge distribution on the surface of P(VDF-TrFE) and the energy band shift of MoS<sub>2</sub> FET with positive and negative polarization, respectively.

#### (4) Raman shift and PL spectrum for the pristine MoS<sub>2</sub> film on SiO<sub>2</sub> substrate by CVD growth

For the pristine monolayer MoS<sub>2</sub> grown by oxygen assistant CVD method on SiO<sub>2</sub>/Si

substrate, the Raman shift has two typical peaks:  $E_{2g}$   $\sim 384$   $\text{cm}^{-1}$  and  $A_{1g}$   $\sim 404$   $\text{cm}^{-1}$ , which reflects the in-plane vibration and out-of-plane phonon coupling mode of  $\text{MoS}_2$ , respectively.<sup>1</sup> The difference between the two peaks is  $\sim 20$   $\text{cm}^{-1}$ , confirming the monolayer property of the film. The PL peak of  $\text{MoS}_2$  is observed at  $\sim 663$  nm ( $A_1$  exciton) and  $\sim 613$  nm ( $B_1$  exciton), corresponding to the direct optical transitions at the Brillouin zone K-point and the spin-orbital splitting of the valence band, respectively.<sup>2</sup> The  $A_1$  peak has a red shift compared with the suspended  $\text{MoS}_2$  film, which is attributing to the doping effect from  $\text{H}_2\text{O}/\text{O}_2$  adsorption on the surface and the impurity scattering from the substrate.

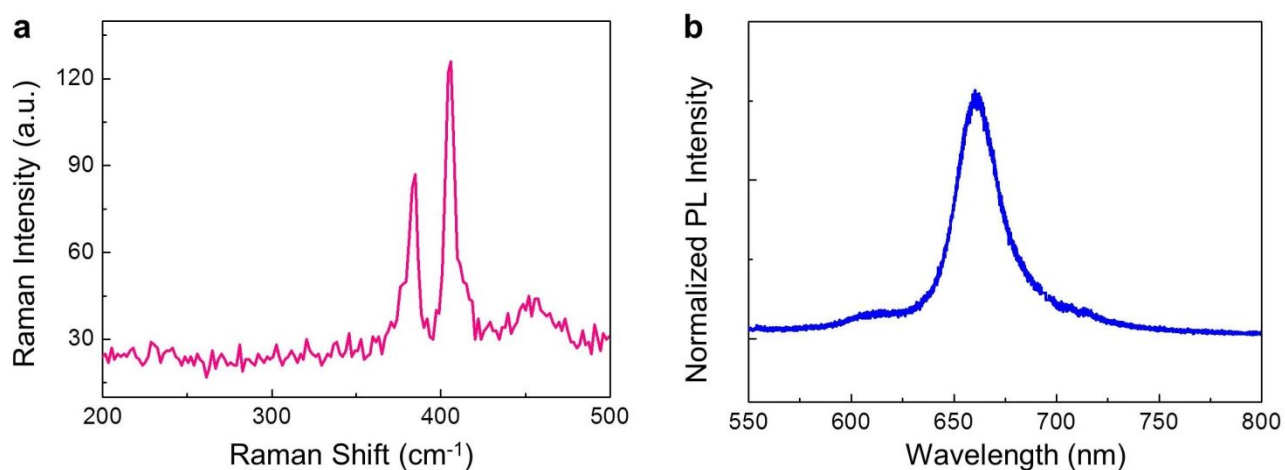

**Figure S4.** The Raman shift (a) and PL spectrum (b) for the pristine  $\text{MoS}_2$  film on  $\text{SiO}_2$

substrate by CVD growth.

**(5) Raman shift and PL spectrum for monolayer MoS<sub>2</sub> FET with P(VDF-TrFE) as gate material under different strains**

The optical property of the MoS<sub>2</sub> FET with the P(VDF-TrFE) film as gate material is shown in Figure S5. In **Figure S5a**, there is nearly no obvious change of the Raman shift (both for A<sub>1g</sub> and E<sub>2g</sub> peak) with strain changing, which means that the piezo-potential induced by P(VDF-TrFE) has no influence on in-plane vibration and out-of-plane phonon coupling mode of MoS<sub>2</sub>. However, for the PL peak with P(VDF-TrFE) under different strain, the A<sub>1</sub> exciton peak shows a blue shift with strain increasing step by step while the B<sub>1</sub> exciton keeps stable. The shift of the A<sub>1</sub> peak under different strains is uniform and repeatable, due to the piezo-potential-reduced passivation of MoS<sub>2</sub> surface states caused by trapped charges from the MoS<sub>2</sub>/SiO<sub>2</sub> interfaces.<sup>3</sup>

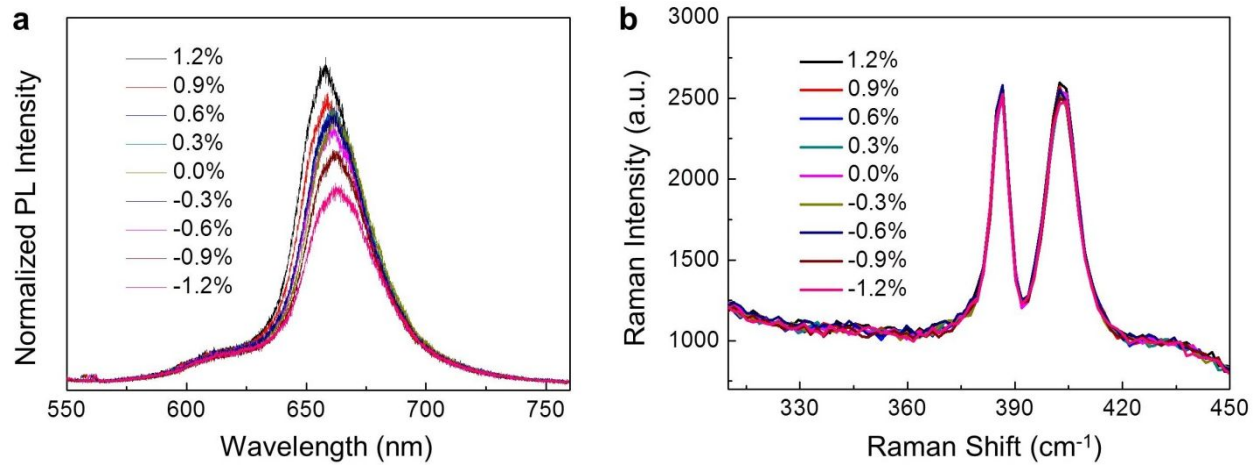

**Figure S5.** (a) Raman shift has no obvious change under different strains. (b) The  $A_1$  exciton peak has a blue shift  $\sim 14$  meV with the strain varying from -1.2% to 1.2%.

## (6) Piezoelectrical property of the P(VDF-TrFE) device

The piezoelectrical property of the pre-polarized P(VDF-TrFE) device is shown in Figure S6. (a) The output voltages of the device varied with strains, indicating linear relationships between voltage and tensile/compressive strain, respectively. (b) With the strain increased step by step from 0% to 0.4%, the corresponding voltage increased. (c) The output voltage of the device under strain  $\sim 0.15\%$  kept stable for over 10 mins, indicating that the good stability of the device under strain.



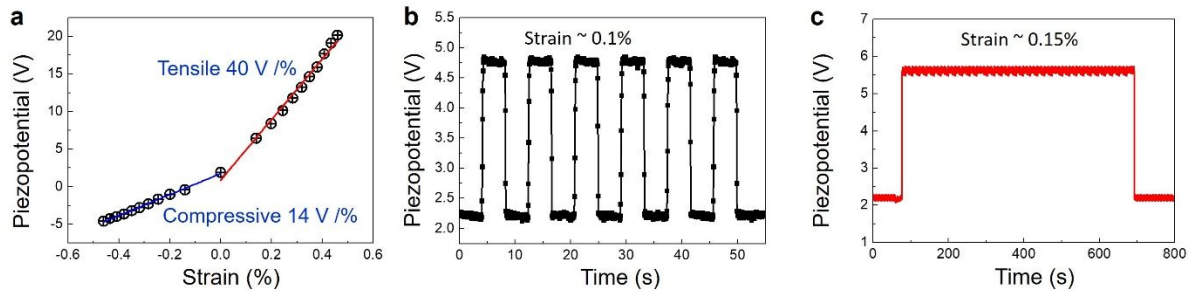

**Figure S6.** The piezoelectrical property of the P(VDF-TrFE) film. (a) The linear relationship between piezo-potential and strain. (b) The piezo-potential varied with the strain pulse ( $\sim 0.1\%$ ). (c) The stability of the piezo-potential voltage under the strain  $\sim 0.15\%$ .

(7) The output property of MoS<sub>2</sub> FET changed with the strain applied on the P(VDF-TrFE) film

When the strain applied on the P(VDF-TrFE) film varying from 0.2% to -0.4%, the  $I$ - $V$  curves of the MoS<sub>2</sub> FET decreased accordingly. The current ( $V_D = 3$  V) changed from  $1.5 \times 10^{-6}$  A to  $7.6 \times 10^{-11}$  A, leading to on/off ratio  $\sim 2 \times 10^4$ , which can be compared to the device property regulated by the external gate voltage. This strain dependent electrical

property is stable and repeatable caused by the piezoelectricity of the P(VDF-TrFE) film.

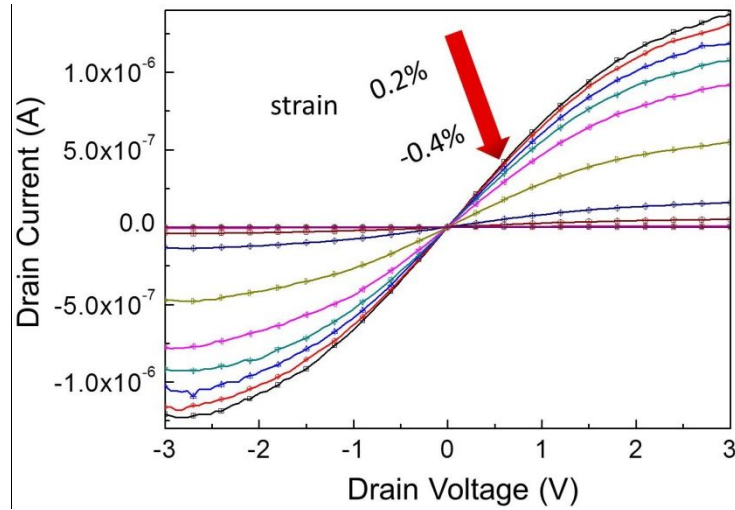

**Figure S7.** The  $I$ - $V$  curve of the MoS<sub>2</sub> FET device changed with the strain applied on the P(VDF-TrFE) film.

#### (8) Gauge factor of the piezo-electret gate MoS<sub>2</sub> FET strain sensor

The gauge factor (GF, or sensitivity) of the device can be defined as the equation:

$$GF = \frac{\Delta R / R_0}{\varepsilon}, \text{ where the } \Delta R / R_0 \text{ and } \varepsilon \text{ is the resistance change rate and strain,}$$

respectively. According to the **Figure S8**, the resistance decreased under strain and the

GF can be calculated to be  $\sim 4800$  with the compressive strain varying from -0.1% to 0%

and 250 with tensile strain varying from 0% to 0.2%, respectively. For the exponential

growth of the resistance with strain increasing, the sensitivity of the device was tunable by different strain range.

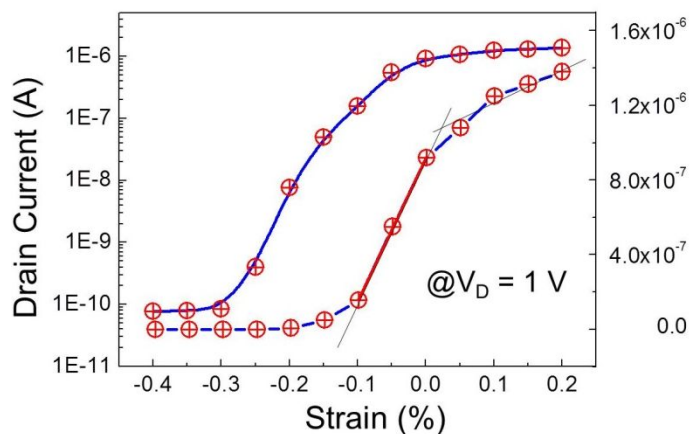

**Figure S8.** The sensitivity of MoS<sub>2</sub> FET extracted from the relationship between drain current and strain.

#### (9) Measurement of the thickness of P(VDF-TrFE) spin-coated on MoS<sub>2</sub> film

After spin-coating 5%wt P(VDF-TrFE) on the surface of the MoS<sub>2</sub> FET and baking for 4 hours to make it completely cured. The thickness of the P(VDF-TrFE) film was measured to be ~ 300 nm by the step profile.

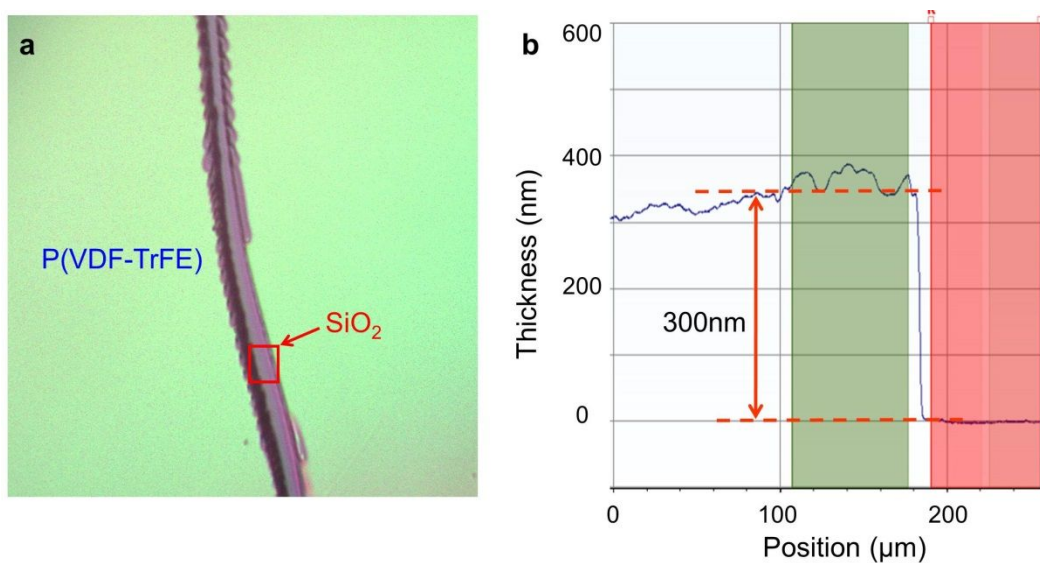

**Figure S9.** The thickness of the P(VDF-TrFE) film is ~ 300 nm measured by the step profile.

(10) The hysteresis of the device with PMMA as the isolation layer

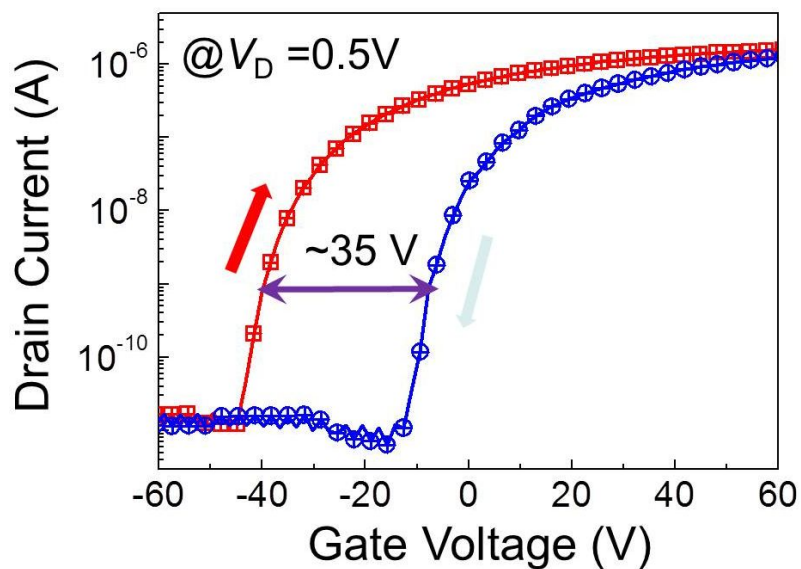

**Figure 10.** The nearly unchangeable large hysteresis of the device with PMMA as the isolation layer shows that the large hysteresis was not coming from the charge traps at the interface between the P(VDF-TrFE) and MoS<sub>2</sub> layer.

# **(11) Perspective of new research direction and applications with piezo- and pyro-electrets**

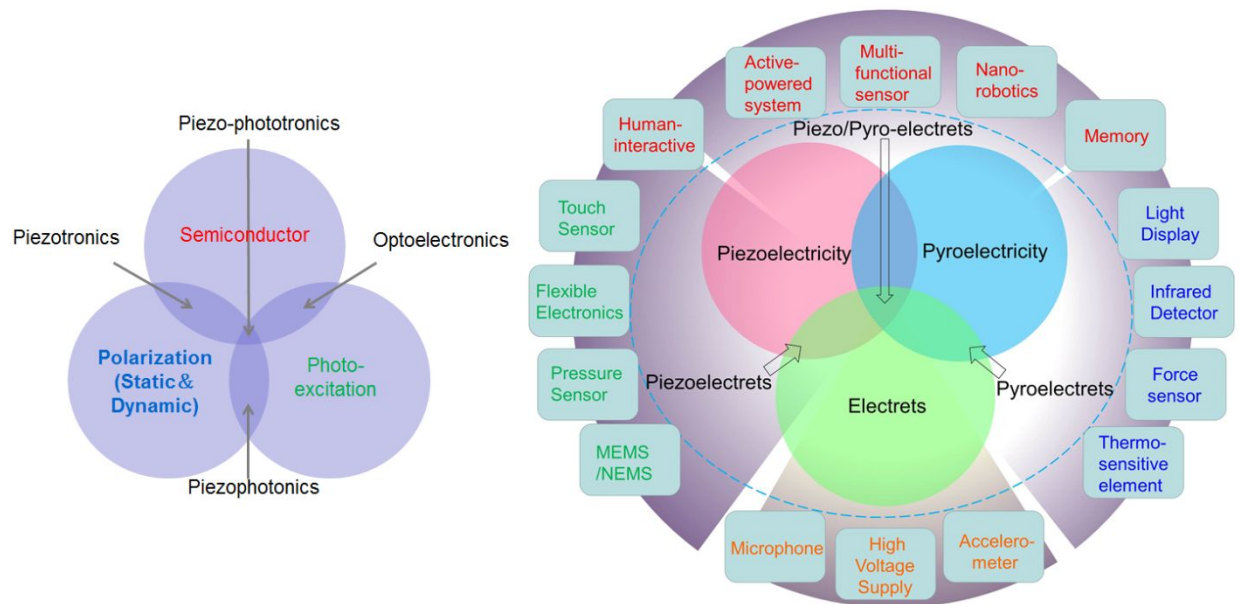

**Figure S11.** New research direction and applications of piezo- and pyro- electrets.

## **References**

1. Lee, C.; Yan, H.; Brus, L. E.; Heinz, T. F.; Hone, J.; Ryu, S., Anomalous Lattice Vibrations of Single- and Few-Layer MoS<sub>2</sub>. *ACS Nano* **2010**, *4*, 2695-2700.
2. Mak, K. F.; He, K. L.; Lee, C.; Lee, G. H.; Hone, J.; Heinz, T. F.; Shan, J., Tightly Bound Trions in Monolayer MoS<sub>2</sub>. *Nat. Mater.* **2013**, *12*, 207-211.
3. Li, Z.; Chang, S.; Chen, C.; Cronin, S. B., Enhanced Photocurrent and Photoluminescence Spectra in MoS<sub>2</sub> Under Ionic Liquid Gating. *Nano Res.* **2014**, *7*, 973-980.
